# Supplementary material for: Identification of N6-Methyladenosine-Related Factors and the Prediction of the Regulatory Mechanism of Hair Follicle Development in Rex and Hycole Rabbits
Source: MDPI journal article supplement (doi:10.3390/biology12111448), 2023-11-17
Supplement: s1 [file s1]

**Supplement Table S1. Summary of reads quality control.**

| Sample     | Raw_Reads | Q20%  | Q30%  | GC%   |
|------------|-----------|-------|-------|-------|
| Ski1-IP    | 86509634  | 97.95 | 94.03 | 51.39 |
| Ski2-IP    | 71769462  | 97.96 | 94.06 | 52.10 |
| Ski3-IP    | 97648830  | 98.10 | 94.32 | 51.16 |
| FYM1-IP    | 95927200  | 98.04 | 94.86 | 54.02 |
| FYM2-IP    | 85645472  | 98.27 | 95.25 | 54.14 |
| FYM3-IP    | 90783892  | 98.20 | 95.12 | 54.03 |
| Ski1-input | 80427926  | 97.95 | 93.96 | 50.25 |
| Ski2-input | 95144464  | 97.87 | 93.80 | 50.85 |
| Ski3-input | 76040226  | 98.04 | 94.10 | 50.62 |
| FYM1-input | 65633142  | 97.84 | 93.63 | 53.23 |
| FYM2-input | 65627376  | 97.67 | 93.33 | 53.24 |
| FYM3-input | 87067342  | 97.94 | 93.96 | 54.11 |

**Supplement Table S2. Summary of reads mapping to the rabbit reference genome**

| Sample     | Valid reads | Mapped reads     | Unique mapped reads | Multi mapped reads |
|------------|-------------|------------------|---------------------|--------------------|
| Ski1-IP    | 84433594    | 77035455(91.24%) | 57799897(68.46%)    | 19235558(22.78%)   |
| Ski2-IP    | 69573620    | 63058511(90.64%) | 48206148(69.29%)    | 14852363(21.35%)   |
| Ski3-IP    | 95145912    | 87122746(91.57%) | 66412571(69.80%)    | 20710175(21.77%)   |
| FYM1-IP    | 44435680    | 29582015(66.57%) | 27843777(62.66%)    | 1738238(3.91%)     |
| FYM2-IP    | 40231350    | 26614523(66.15%) | 25121280(62.44%)    | 1493243(3.71%)     |
| FYM3-IP    | 41674194    | 27607810(66.25%) | 25964269(62.30%)    | 1643541(3.94%)     |
| Ski1-input | 78927016    | 73396127(92.99%) | 53160162(67.35%)    | 20235965(25.64%)   |
| Ski2-input | 93057700    | 86119450(92.54%) | 62593892(67.26%)    | 23525558(25.28%)   |
| Ski3-input | 74385726    | 69170798(92.99%) | 50984231(68.54%)    | 18186567(24.45%)   |
| FYM1-input | 65037230    | 49538616(76.17%) | 47339413(72.79%)    | 2199203(3.38%)     |
| FYM2-input | 64467766    | 48916621(75.88%) | 46809471(72.61%)    | 2107150(3.27%)     |
| FYM3-input | 86073096    | 64785290(75.27%) | 61697031(71.68%)    | 3088259(3.59%)     |

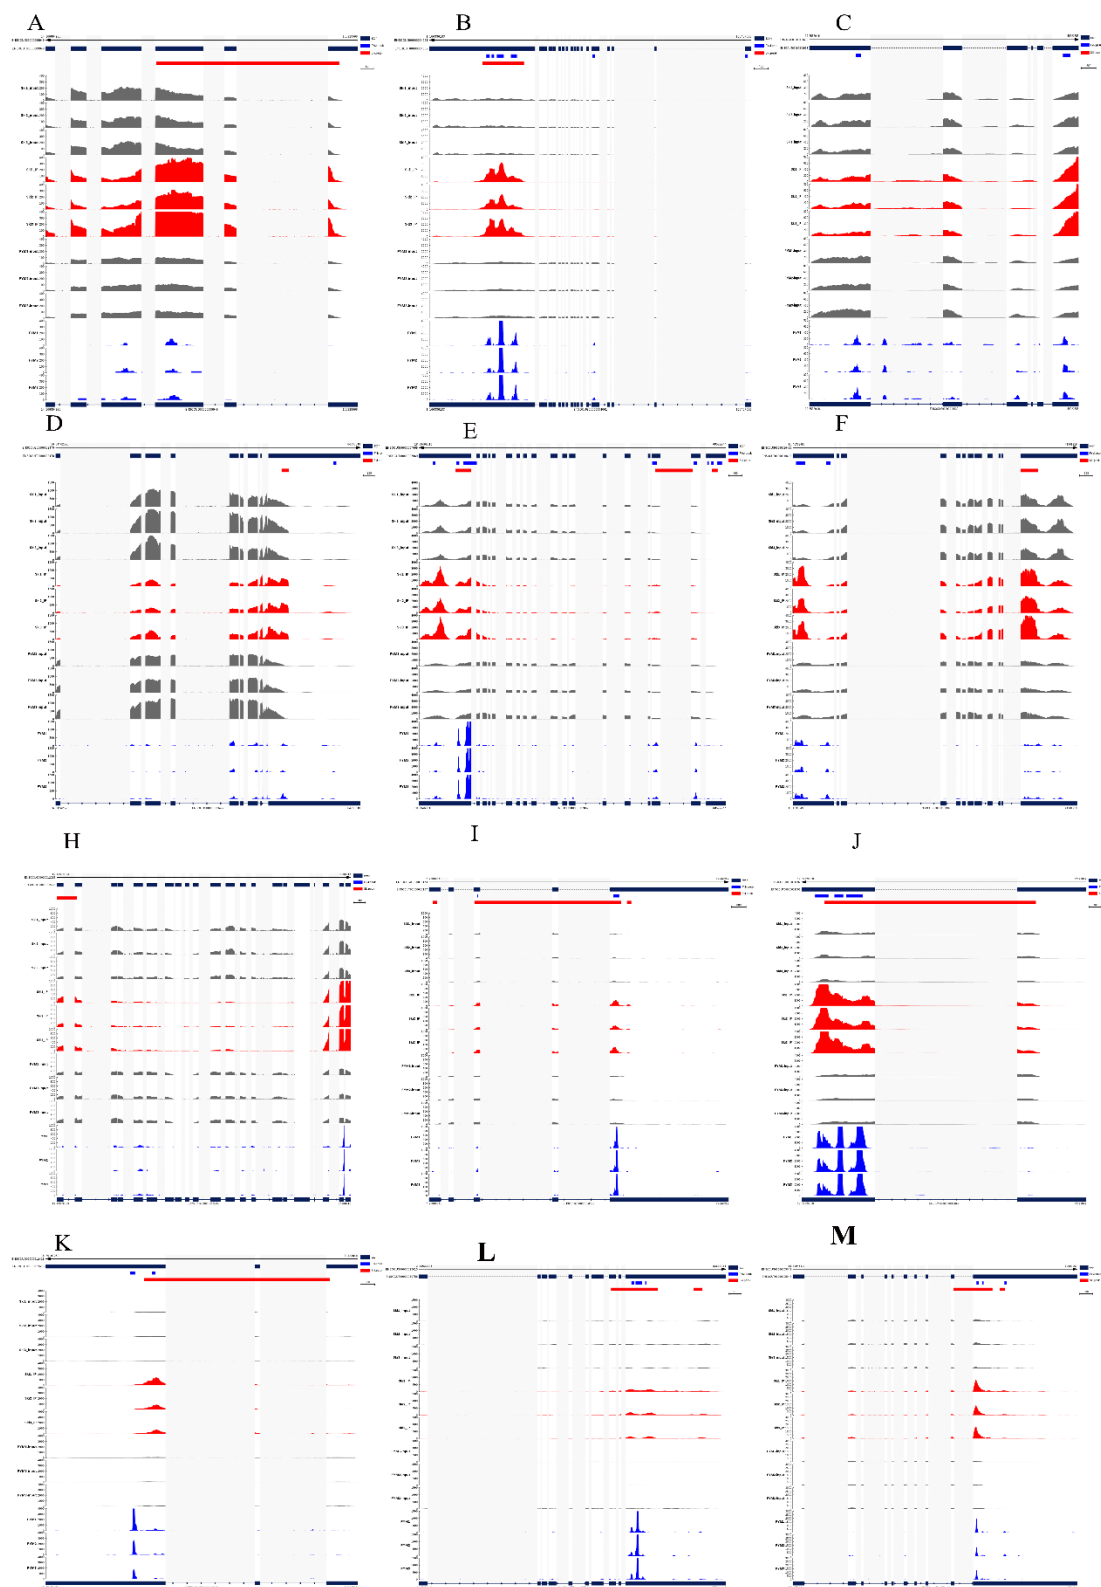

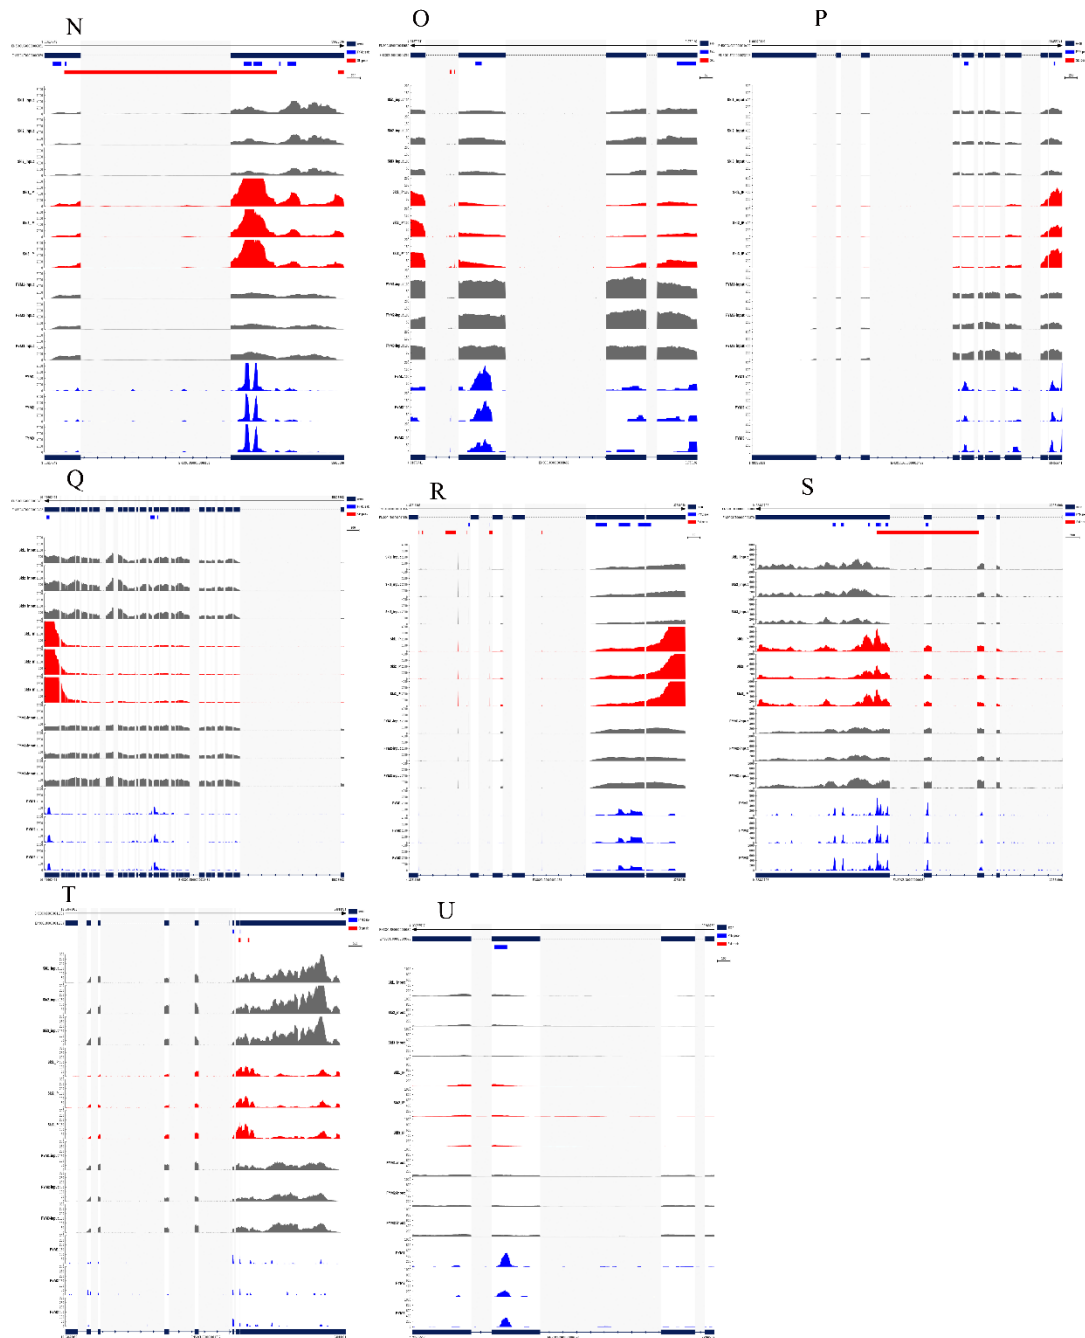

**Supplement Figure S1.**The abundance of m<sup>6</sup>A in the Rex rabbit and Hycole rabbit skin (A) M<sup>6</sup>A methylated peaks of CD200 mRNA; (B) M<sup>6</sup>A methylated peaks of LGR4 mRNA; (C) M<sup>6</sup>A methylated peaks of SOX9 mRNA; (D) M<sup>6</sup>A methylated peaks of CD34 mRNA; (E) M<sup>6</sup>A methylated peaks of FGFR2 mRNA; (F) M<sup>6</sup>A methylated peaks of LEF1 mRNA; (H) M<sup>6</sup>A methylated peaks of TRPV3 mRNA; (I) M<sup>6</sup>A methylated peaks of WNT2 mRNA; (J) M<sup>6</sup>A methylated peaks of BMP4 mRNA; (K) M<sup>6</sup>A methylated peaks of FGF5 mRNA; (L) M<sup>6</sup>A methylated peaks of EDAR mRNA; (M) M<sup>6</sup>A methylated peaks of LIPH mRNA; (N) M<sup>6</sup>A methylated peaks of MSX2 mRNA; (O) M<sup>6</sup>A methylated peaks of IGF1 mRNA; (P) M<sup>6</sup>A

methyated peaks of ETS1 mRNA; (Q) M<sup>6</sup>A methyated peaks of EGFR mRNA; (R) M<sup>6</sup>A methyated peaks of HOXC13 mRNA; (S) M<sup>6</sup>A methyated peaks of WNT5A mRNA; (T) M<sup>6</sup>A methyated peaks of RUNX2 mRNA; (U) M<sup>6</sup>A methyated peaks of WNT10B mRNA.
